# Supplementary material for: Techno-economic evaluation and life cycle assessment for sustainable alternative biorefinery concepts using the organic fraction of municipal solid waste
Source: Royal Society of Chemistry journal article supplement (doi:10.1039/d3gc00244f), 2023-01-01
Supplement: d3gc00244f1.pdf [file d3gc00244f1.pdf]

## Techno-economic evaluation and life cycle assessment for sustainable alternative biorefinery concepts using the organic fraction of municipal solid waste

Sofia-Maria Ioannidou<sup>a</sup>, José Pablo López-Gómez<sup>b</sup>, Joachim Venus<sup>b</sup>, Miguel Angel Valera<sup>c</sup>, Vera Eßmann<sup>d</sup>, Irantzu Alegria-Dallo<sup>e</sup>, Ioannis K. Kookos<sup>f</sup>, Apostolis Koutinas<sup>a</sup> and Dimitrios Ladakis<sup>a</sup>

<sup>a</sup> Department of Food Science and Human Nutrition, Agricultural University of Athens, Iera Odos 75, 118 55 Athens, Greece.

<sup>b</sup> Microbiome Biotechnology Department, Leibniz Institute for Agricultural Engineering and Bioeconomy, Max-Eyth-Allee 100, Potsdam, 14469, Germany

<sup>c</sup> Instituto Tecnológico del Plástico (AIMPLAS), Calle Gustave Eiffel 4, 46980 Paterna, Spain

<sup>d</sup> Covestro Deutschland AG, Kaiser-Wilhelm-Allee 60, 51373 Leverkusen, Germany

<sup>e</sup> National Renewable Energy Centre (CENER), Av. Ciudad de la Innovación 7, E31621 Sarriguren, Spain

<sup>f</sup> Department of Chemical Engineering, University of Patras, 26504 Rio, Greece

### Supplementary Information

Table S1. Optimal bioreactor design parameters for lactic acid production in various annual capacities. The bioreactor design optimization was based on the methodology developed by Dheskali et al.<sup>17</sup>

| <b>Annual capacity (t)</b>                                | <b>10,000</b> | <b>20,000</b> | <b>40,000</b> | <b>50,000</b> | <b>60,000</b> |
|-----------------------------------------------------------|---------------|---------------|---------------|---------------|---------------|
| Loading time, $\tau_l$ (h)                                | 2             | 2             | 2             | 4             | 4             |
| Uploading time, $\tau_{ul}$ (h)                           | 5             | 5             | 5             | 3             | 3             |
| Number of batches per year, $N_b$                         | 1579          | 1579          | 1579          | 2631          | 2631          |
| Number of bioreactors per batch, $N_f$                    | 6             | 6             | 6             | 10            | 10            |
| Working volume of each bioreactor $V_b$ (m <sup>3</sup> ) | 105.5         | 211.1         | 422.2         | 316.7         | 380.1         |

Table S2. Optimal bioreactor design parameters for succinic acid production in various annual capacities. The bioreactor design optimization was based on the methodology developed by Dheskali et al.<sup>17</sup>

| <b>Annual capacity (t)</b>                                 | <b>10,000</b> | <b>20,000</b> | <b>40,000</b> | <b>50,000</b> | <b>60,000</b> |
|------------------------------------------------------------|---------------|---------------|---------------|---------------|---------------|
| Loading time, $\tau_l$ (h)                                 | 2             | 2             | 2             | 2             | 4             |
| Uploading time, $\tau_{ul}$ (h)                            | 6             | 4             | 2             | 2             | 2             |
| Number of batches per year, $N_b$                          | 1314          | 1971          | 3942          | 3942          | 3942          |
| Number of bioreactors per batch, $N_f$                     | 7             | 10            | 19            | 19            | 20            |
| Working volume of each bioreactor, $V_b$ (m <sup>3</sup> ) | 258.8         | 345.1         | 345.1         | 431.4         | 517.7         |

Table S3. Unitary cost of raw materials.<sup>30</sup>

| <b>Raw Material</b> | <b>Unitary prices 2018<br/>(\$/t)</b> |
|---------------------|---------------------------------------|
| HCl                 | 61                                    |
| NaOH                | 400                                   |
| Nutrients           | 950                                   |
| Ethanol             | 680                                   |
| Petroleum ether     | 1,000                                 |
| Acetone             | 1,500                                 |
| KOH (85%)           | 400                                   |
| NPG                 | 1,500                                 |
| HXDO                | 3,500                                 |
| Additives for HMAs  | 1,894                                 |
| Additives for PUDs  | 5,500                                 |
| Enzyme              | 1,000                                 |
| Water               | 0.435                                 |

Table S4. Summary of the mass and energy balances inventory for all processes.

|                      | Unit                      | SA     | LA   | Biosurfactants | HMA   | PP   | PUDs  |
|----------------------|---------------------------|--------|------|----------------|-------|------|-------|
| Sugars               | kg/kg <sub>product</sub>  | 1.78   | 1.43 | -              | -     | -    | -     |
| Solid residues (dry) | kg/kg <sub>product</sub>  | -      | -    | 11.9           | -     | -    | -     |
| 1,6-hexanediol       | kg/kg <sub>product</sub>  | -      | -    | -              | -     | 0.44 | -     |
| Neopentyl glycol     | kg/kg <sub>product</sub>  | -      | -    | -              | -     | 0.26 | -     |
| Succinic acid        | kg/kg <sub>product</sub>  | -      | -    | -              | -     | 0.63 | -     |
| Lactic acid          | kg/kg <sub>product</sub>  | -      | -    | -              | 0.96  | -    | -     |
| Additives            | kg/kg <sub>product</sub>  | -      | -    | -              | 0.41  | -    | 0.14  |
| Nutrients            | kg/kg <sub>product</sub>  | 0.29   | -    | -              | -     | -    | -     |
| HCl                  | kg/kg <sub>product</sub>  | 1.34   | -    | 1.84           | -     | -    | -     |
| NaOH                 | kg/kg <sub>product</sub>  | 1.20   | 0.04 | 0.23           | -     | -    | -     |
| KOH (85%)            | kg/kg <sub>product</sub>  | -      | -    | 0.82           | -     | -    | -     |
| Ethanol              | kg/kg <sub>product</sub>  | -      | -    | 0.23           | -     | -    | -     |
| Petroleum ether      | kg/kg <sub>product</sub>  | -      | -    | 0.17           | -     | -    | -     |
| Acetone              | kg/kg <sub>product</sub>  | -      | -    | -              | -     | -    | 0.67  |
| Enzyme               | kg/kg <sub>product</sub>  | -      | -    | 0.048          | -     | -    | -     |
| Water                | kg/kg <sub>product</sub>  | 2.05   | 6.4  | -              | -     | -    | 0.61  |
| Electricity          | kWh/kg <sub>product</sub> | 3.93   | 3.97 | 3.02           | 2.82  | 0.01 | 0.01  |
| Steam                | kg/kg <sub>product</sub>  | 0.89   | 2.36 | 1.32           | 0.41  | 3.56 | 0.52  |
| Cooling water        | kg/kg <sub>product</sub>  | 171.74 | 39.9 | 27.70          | 16.07 | -    | 22.55 |

Table S5. Parameters of the DCF analysis taken from Humbird et al.<sup>15</sup>

|                                                                |                                                   |
|----------------------------------------------------------------|---------------------------------------------------|
| Discount rate (or interest rate)                               | 10 %                                              |
| Plant life time                                                | 30 years                                          |
| Equity financing                                               | 100 %                                             |
| Depreciation via MACRS                                         | 200% declining balance and 7 year recovery period |
| Corporate tax rate                                             | 35 %                                              |
| Plant construction duration                                    | 3 years                                           |
| % of project cost in the 1st, 2nd and 3rd year of construction | 8 % - 60% - 32 %                                  |
| Working capital                                                | 5 % of FCI                                        |
| Salvage value                                                  | 0                                                 |
| Land costs                                                     | 0                                                 |

Table S6. Greenhouse gas emission of the fossil- and bio-based counterparts of the end-products derived from OFMSW

| Fossil- and bio-based counterpart      | GHG (kg CO <sub>2</sub> -eq/kg <sub>product</sub> ) | Reference                       |
|----------------------------------------|-----------------------------------------------------|---------------------------------|
| Bio-based LA from corn-derived glucose | 0.3-1.2                                             | De Matos et al. <sup>35</sup>   |
| Fossil-based SA                        | 1.89                                                | Dewulf et al. <sup>37</sup>     |
| Bio-based SA from corn-derived glucose | 0.88                                                | Cok et al. <sup>11</sup>        |
| Fossil-based surfactants               | 2.1                                                 | Schowaneck et al. <sup>38</sup> |
| Fossil adhesives                       | 5.0                                                 | McDevitt et al. <sup>39</sup>   |
| Adipic acid based PUDs                 | 3.4                                                 | EPDLA <sup>40</sup>             |

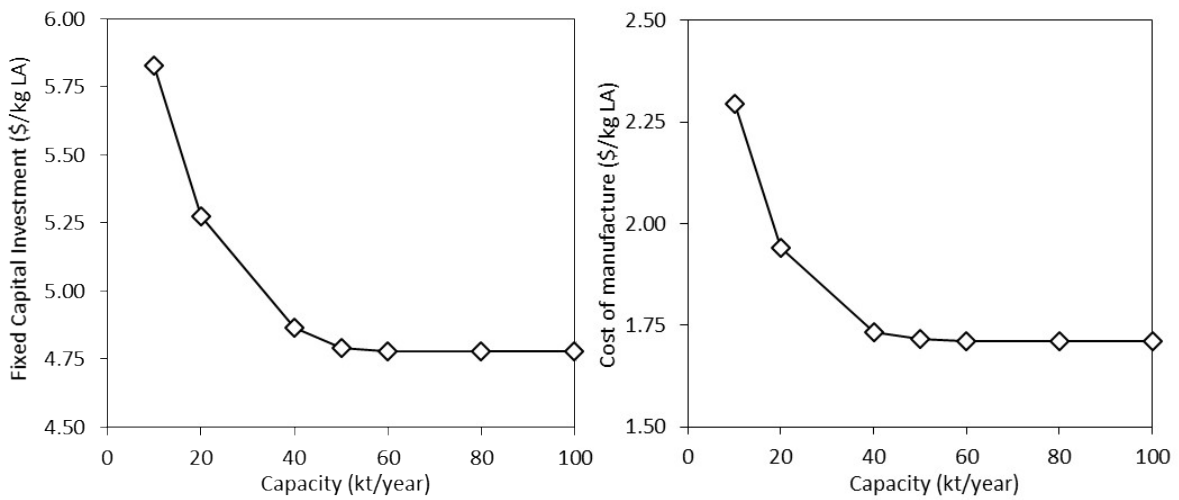

**Figure S1.** Fixed capital investment (a), cost of manufacture (b) per kg lactic acid as a function of lactic acid annual production capacity.

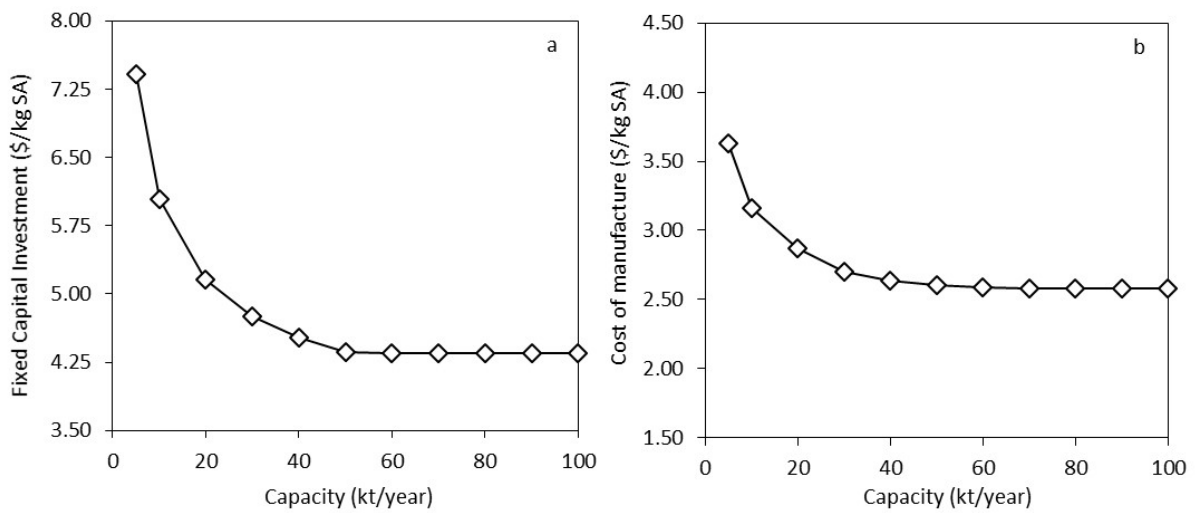

**Figure S2.** Fixed capital investment (a) and cost of manufacture (b) per kg succinic acid as a function of succinic acid annual production capacity.

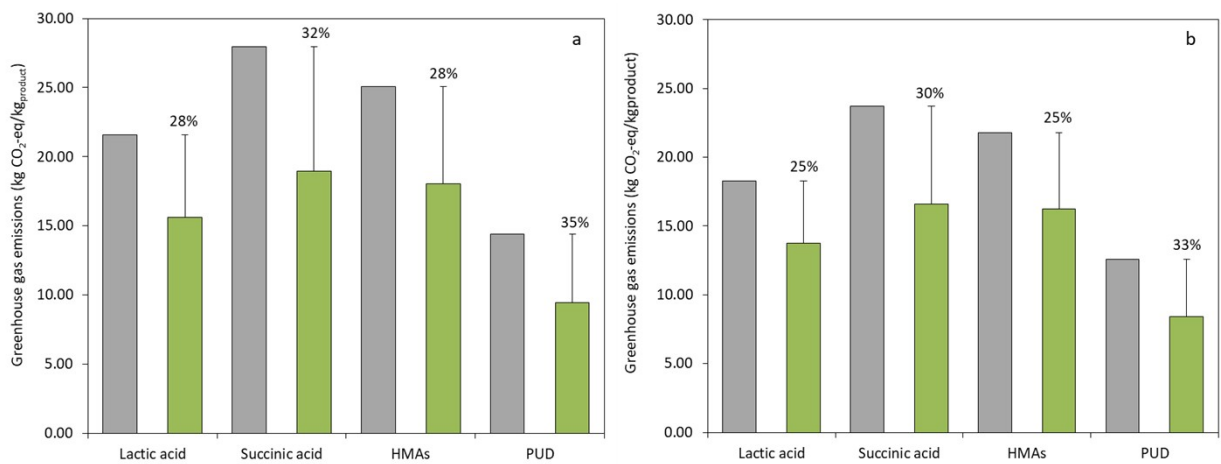

**Figure S3.** Greenhouse gas emissions (kg CO<sub>2</sub>-eq/kg product) for lactic acid, succinic acid, HMAs, and PUD.

**Figure S3.** Environmental performance of all processes in GHG emissions for base case scenario and alternative approach having as OFMSW management 100% landfilling (a) and 37.45% recycling/62.55% landfilling (b).
